# Supplementary material for: Humoral immune response to omicron infection in long-term Wuhan-Hu-1-imprinted population
Source: Research Square preprint supplement (doi:10.21203/rs.3.rs-3024491/v1), 2023-06-22
Supplement: Supplementary file 1 [file ea248bf59f3d647290b0727a.xlsx]

## Sheet: Table1
Supplementary Table 1: Demographic and clinical characteristics of study cohorts
Prior exposure	Internal ID	Sex at birth	Age	WH1 infection dates		Omicron infection diagnosis date	Post-omicron infection						Pre-omicron infection
				Admission	Discharge		Blood collection date	WH1 RBD Ab (S/CO)	WT pVNT50	BF7 pVNT50	BQ.1.1 pVNT50	XBB.1.5 pVNT50	Blood collection date	WH1 RBD Ab (S/CO)	WT pVNT50	BF7 pVNT50	BQ.1.1 pVNT50	XBB.1.5 pVNT50
WH1 infection + 1x WIV	2	Female	52	2020-01-29	2020-02-23	2022-12-28	2023-03-02	13581	2259	112.8	147.5	20.62
	8	Male	59	2020-01-22	2020-02-06	2022-12-22	2023-02-25	20762	7347	6374	2180	273.5
	12	Male	48	2020-01-27	2020-02-25	2022-12-24	2023-02-25	24265	5578	12328	2897	160.3
	15	Female	42	2020-02-01	2020-03-07	2022-12-24	2023-02-25	8929	1996	785.6	322.5	28.41
	32	Male	58	2020-02-02	2020-03-27	2023-01-03	2023-03-02	22237	5642	3960	580.5	128.7
WH1 infection + 2x WIV	1	Male	57	2020-01-31	2020-02-13	2022-12-18	2023-02-20	20202	3623	1321	326.2	131.2
	4	Female	65	2020-02-07	2020-02-29	2022-12-22	2023-02-20	14658	11339	1107	159	103.8
	9	Male	50	2020-01-27	2020-02-25	2022-12-24	2023-02-25	24549	6784	16578	3819	765.8
	16	Female	57	2020-02-07	2020-02-26	2022-12-25	2023-02-25	52797	10674	11740	899.7	245.9
	17	Female	59	2020-01-26	2020-02-26	2022-12-25	2023-02-25	5190	4696	1193	171	19.05
	20	Female	72	2020-02-06	2020-02-23	2022-12-30	2023-03-02	12564	8118	7585	818.5	43.22
	22	Female	52	2020-01-30	2020-03-09	2022-12-28	2023-03-02	7147	2926	635.8	90.17	102.1
	24	Female	58	2020-01-19	2020-03-07	2023-01-05	2023-03-08	2272	24253	15699	3289	542.1
	26	Female	61	2020-02-02	2020-02-24	2022-12-19	2023-02-20	2149	6235	2160	65.68	58.57
	29	Female	71	2020-01-29	2020-02-08	2022-12-23	2023-02-25	12029	1924	1851	25.88	26.92
	30	Female	9	2020-02-01	2020-03-27	2022-12-22	2023-02-25	3252	1593	531.7	44.07	35.35
	31	Male	30	2020-02-01	2020-03-10	2022-12-17	2023-02-20	49234	22615	1654	368.8	68.26
	33	Male	72	2020-02-02	2020-02-14	2023-01-09	2023-03-08	1841	1314	143.1	113.7	20.77
	34	Female	60	2020-02-10	2020-03-02	2023-01-11	2023-03-08	4054	720.9	86.48	33.87	17.84
	40	Male	39	2020-01-31	2020-02-29	2022-12-25	2023-02-25	16744	3920	2021	763.3	142
	42	Male	54	2020-02-11	2020-03-02	2022-12-26	2023-02-25	9878	6500	796.5	121.1	59.8
	43	Female	46	2020-02-01	2020-03-10	2022-12-27	2023-02-25	60685	32693	4000	255.2	111.3
	44	Female	57	2020-02-16	2020-02-21	2022-12-21	2023-02-20	5753	2420	526.8	68.1	35.06
	64	Female	41	2020-01-30	2020-03-02	2023-01-02	2023-03-02	14396	5513	4504	857.6	229.9
	76	Female	53	2020-01-26	2020-02-19	2022-12-24	2023-02-25	6777	5999	66486	282.3	87.32
WH1 infection + 3x WIV	3	Female	63	2020-02-05	2020-02-24	2023-01-05	2023-03-08	7488	2855	108.7	60.1	30.13	2022-09-03	139.75	1269	30.64	15.58	11.77
	5	Female	27	2020-01-29	2020-02-21	2023-01-09	2023-03-08	1541	643.2	593.5	731.3	50.07
	6	Male	54	2020-01-29	2020-02-25	2022-12-21	2023-02-20	14046	1623	1575	2003	89.26	2022-09-03	635.74	1526	139.2	47.69	7.832
	7	Female	48	2020-02-01	2020-02-25	2022-12-27	2023-02-25	24582	4324	18828	2892	1312	2022-09-04	530	636.4	161.2	38.4	17.12
	10	Male	70	2020-02-01	2020-03-01	2022-12-17	2023-02-20	78457	34930	26639	8192	5092	2022-09-04	802	2686	129	28.48	30.86
	11	Male	51	2020-02-17	2020-03-10	2022-12-26	2023-02-25	19449	8151	8817	1444	271.8	2022-09-03	320.36	1065	115.1	26.71	5.117
	13	Female	63	2020-02-08	2020-02-29	2022-12-28	2023-02-25	19434	3875	594.1	153.3	73.45	2022-09-03	452	792.4	88.26	30.21	13.83
	14	Female	51	2020-01-29	2020-02-12	2022-12-25	2023-02-25	28302	8960	4616	275.4	146.3	2022-09-03	515.66	1268	142.4	29.38	15.52
	18	Male	56	2020-02-16	2020-03-27	2022-12-25	2023-02-25	20017	8170	5259	197.2	118.2	2022-09-04	582.78	2159	212.2	24.96	37.68
	19	Female	56	2020-01-29	2020-02-21	2023-01-22	2023-03-23	7885	6809	696.5	69.97	61.73	2022-09-04	188.63	1113	129.7	31.1	35.17
	21	Male	50	2020-01-31	2020-02-23	2022-12-24	2023-02-25	35733	6476	2550	934.4	129.6
	23	Female	61	2020-02-01	2020-02-29	2022-12-29	2023-03-02	21527	21288	1560	193.3	63.3	2022-09-03	1350.02	8275	1388	27.57	64.46
	27	Female	34	2020-01-28	2020-02-25	2022-12-31	2023-03-02	15250	2759	4797	69.42	150.6
	28	Male	56	2020-02-02	2020-03-11	2022-12-24	2023-02-25	2411	749.5	924.7	51.33	69.04
	41	Female	45	2020-02-01	2020-02-15	2023-01-26	2023-03-23	3867	3785	1508	233.4	26.59	2022-09-03	48.05	1147	83.41	18.99	5.061
	85	Male	53	2020-01-31	2020-02-23	2023-01-12	2023-03-08	5953	3986	5328	239	58.94	2022-09-04	216.4	1167	117.9	32.98	12.82
	90	Male	55	2020-01-28	2020-02-28	2023-01-05	2023-03-08	14717	29899	13159	1576	131.8	2022-09-04	650.28	2094	160.3	25.48	72.36
3x WIV	25	Female	44			2022-12-17	2023-02-20	19514	1861	93.54	58.71	40.88	2022-08-17	12.87	493.9	3.704	10.83	12.62
	36	Female	29			2022-12-25	2023-02-25	22811	8782	462.4	141.4	126.7
	54	Male	35			2022-12-19	2023-02-20	1554	317.6	6.845	4.016	4.138
	61	Female	52			2022-12-18	2023-02-20	1338	2456	525.3	96.2	15.73	2022-08-17	56.44	174.7	2.154	5.131	5.515
	66	Female	43			2022-12-22	2023-02-25	29186	23251	11079	91.22	17.34	2022-08-17	468.58	177.8	10.05	17.2	2.918
	77	Male	31			2022-12-25	2023-02-25	5670	1922	140.4	171.1	16.8	2022-08-17	457.6	207.4	31.39	4.579	2.442
	78	Female	32			2022-12-21	2023-02-20	8998	5282	6952	178	28.75
	79	Female	34			2022-12-14	2023-02-20	3217	2096	30.78	33.11	16.65
	80	Female	30			2022-12-17	2023-02-20	77433	16599	95.47	27.87	20.57	2022-08-17	547.61	27.82	5.97	5.341	5.265
	81	Female	23			2022-12-19	2023-02-20	6766	5667	326	502.8	49.11
	82	Female	30			2022-12-12	2023-02-20	6821	854.2	59.78	48.22	43.64
	83	Female	26			2022-12-20	2023-02-20	3866	1909	350.8	233.8	22.28
	84	Female	26			2022-12-22	2023-02-20	7255	2495	162.6	878.4	34.78
	86	Female	26			2022-12-17	2023-02-20	5960	1763	95.18	47.66	45.13
	87	Male	24			2022-12-19	2023-02-20	6397	2129	69.58	6.524	14.76
	88	Female	34			2022-12-22	2023-02-20	5877	3245	270.1	657.3	44.98
	89	Female	23			2022-12-21	2023-02-20	6668	20860	3073	6704	18.14
	91	Female	26			2022-12-27	2023-02-25	16852	5526	937.7	154.8	34.88	2022-08-17	269.08	397.2	41.77	19.75	8.49
	92	Female	23			2022-12-22	2023-02-20	18126	5882	1187	232.6	34.68
	93	Male	30			2022-12-25	2023-02-25	1131	778	4941	12.54	14.63	2022-08-17	17.28	89.6	2.767	10.27	1.498
	94	Female	24			2022-12-23	2023-02-25	6473	3257	13570	2436	133.4
	95	Female	30			2022-12-24	2023-02-25	2112	1025	163.2	59.6	21.57
	96	Female	23			2022-12-22	2023-02-20	6228	1969	7127	105.3	20.69
	97	Female	24			2022-12-19	2023-02-20	7465	6337	183.4	125.2	25.26
	98	Male	22			2022-12-16	2023-02-20	29256	25520	1668	266.3	49.77	2022-08-17	242.93	270.1	3.527	0.9947	0.39
	99	Female	47			2022-12-12	2023-02-20	12448	27558	657.9	152.3	56.53	2022-08-17	75.26	87.32	3.89	2.128	0.9603
	100	Female	32			2022-12-17	2023-02-20	5424	79019	1996	70.06	6.464	2022-08-17	85.4	159.4	2.42	1.779	1.001
	101	Female	34			2022-12-18	2023-02-20	1462	59599	791.7	35.63	30.71	2022-08-17	20.97	215.3	0.39	1.232	0.9834
	102	Male	26			2022-12-18	2023-02-20	1178	73188	131.7	26.21	24.66	2022-08-17	14.06	37.74	0.39	10.04	8.081
	103	Male	23			2022-12-18	2023-02-20	14027	38576	384.3	3567	67.62
3x ZF2001	51	Male	23			2022-12-17	2023-02-20	70289	6689	473.4	60.36	96.84	2022-02-25	613.58	2671	70.35	17.79	1.8976
	52	Female	21			2022-12-22	2023-02-25	46243	4925	5124	154.2	134.9	2022-02-26	400.11	154.7	10.395	5.686	0.4848
	53	Female	22			2022-12-28	2023-03-02	48828	7112	7745	292.4	352.8	2022-02-26	573.1	137.8	4.57	1.6146	0.39
	55	Female	23			2022-12-16	2023-02-20	31452	1786	329	24.41	56.23	2022-02-26	140.85	351.3	5.85	1.4912	0.39
	57	Female	22			2022-12-21	2023-02-20	22964	4998	2136	173.6	186.1	2022-02-26	234.55	4134	19.9	12.956	2.834
	58	Female	21			2022-12-19	2023-02-20	68690	6436	407.5	32.11	45.1	2022-02-25	544.77	1045	19.065	17.594	13.936
	59	Female	22			2022-12-18	2023-02-20	84078	6799	1311	20.19	51.33	2022-02-26	419.32	3670	31.945	9.644	2.818
	60	Female	22			2022-12-18	2023-02-20	18206	7147	239.6	6.726	16.3	2022-02-26	182.87	6100	0.698	11.032	1.1568
	62	Female	21			2022-12-19	2023-02-20	7462	3180	130.3	16.82	165.3	2022-02-26	458.04	250.1	33.39	12.692	2.866
	63	Female	21			2022-12-21	2023-02-20	22788	5940	2285	67.82	54.53	2022-02-26	300.21	463.4	25.92	5.396	5.646
	-	Female	22										2022-02-25	288.5	9146	29.045	12.616	3.318
	-	Female	21										2022-02-25	360.8	8145	5.365	10.842	1.1948
	-	Female	22										2022-02-26	704.01	18716	19.28	25.68	4.736
	-	Female	24										2022-02-26	31.77	5099	2.3095	2.6	0.39
Naïve	35	Male	49			2023-01-13	2023-03-08	105.99	505.8	3692	636.1	140.7
	37	Male	87			2022-12-14	2023-02-20	311.54	2691	355.6	109.4	61.27
	38	Male	75			2022-12-27	2023-02-25	2.03	103.7	117.6	111	19.97
	39	Male	88			2023-01-14	2023-03-08	0.45	221.5	218.3	90.71	13.04
	45	Male	54			2022-12-15	2023-02-20	0.94	573.1	23.82	81.89	1.182
	46	Male	69			2022-12-16	2023-02-20	7.05	660.1	137.2	33.12	21.69
	47	Male	56			2022-12-23	2023-02-20	9.01	240.9	2075	34.03	12.24
	48	Male	68			2022-12-17	2023-02-20	5.48	883.1	946.4	115.3	29.64
	49	Female	52			2022-12-31	2023-03-02	4.67	46.13	21.31	13.46	8.393
	50	Male	68			2022-12-29	2023-03-02	5.80	148.6	564.6	12.03	5.974
	56	Male	54			2022-12-15	2023-02-20	18.24	677.1	48.1	7.552	6.193
	67	Male	54			2022-12-18	2023-02-20	3.64	112.1	32.12	15.9	2.025
	68	Female	48			2023-01-11	2023-03-08	1.03	41.8	13.93	9.07	1.252
	69	Male	64			2023-01-01	2023-03-02	4.26	50.69	553.7	5.443	19.39
	70	Male	77			2022-12-26	2023-02-25	10.88	66.91	214.3	11.45	15.72
	71	Female	49			2022-12-30	2023-03-02	8.59	79.83	72.27	17.68	9.777
	72	Female	65			2022-12-27	2023-02-25	18.1	81.05	283.2	129.8	23.33
	73	Male	78			2022-12-29	2023-03-02	0.1	134.6	6.349	1.191	0.8035
	74	Male	69			2022-12-18	2023-02-20	4.92	246.4	65.72	114.6	18.24
Neutralization titers in red were below the limit of detection (0.39).
